# Supplementary material for: Tris-imidazolium and benzimidazolium ionic liquids: a new class of biodegradable surfactants
Source: Royal Society of Chemistry journal article supplement (doi:10.1039/c4ra14027c), 2014-12-02
Supplement: c4ra14027c1.pdf [file c4ra14027c1.pdf]

## Tris-imidazolium and benzimidazolium ionic liquids: A new class of biodegradable surfactants

Nassir N. Al-Mohammed\*, Rusnah Syahila Duali Hussien, Yatimah Alias\* and Zanariah Abdullah  
Chemistry Department, Faculty of Science, University of Malaya, Lembah Pantai, 50603 Kuala Lumpur, Malaysia

### Supplementary Information

Structural and characterization data

#### Tris-((2-chloro-acetayloxy)methyl)ethane (3)

Colourless crystals; Yield: 27.94 g (96%); m.p 42-44°C. Molecular Formula: C<sub>11</sub>H<sub>15</sub>Cl<sub>3</sub>O<sub>6</sub>; Mol. Wt.: 349.59; FTIR (cm<sup>-1</sup>): 2960, 2852 (C-H)<sub>Aliph</sub>, 1732 (C=O), 1174, 1150 (O-C), 789 (C-Cl); <sup>1</sup>H-NMR (400 MHz, CDCl<sub>3</sub>) δ ppm: 4.08 (s, 6H, CH<sub>2</sub>-Cl), 4.04 (s, 6H, CH<sub>2</sub>-O), 1.02 (s, 3H, CH<sub>3</sub>); <sup>13</sup>C-NMR (100 MHz, CDCl<sub>3</sub>) δ ppm: 167.00 (C=O), 66.98 (CH<sub>2</sub>-O), 40.73 (CH<sub>2</sub>-Cl), 38.42 (-C-), 16.92 (CH<sub>3</sub>); EIMS (m/z): 347.9 (10%)(M), 273.0 (12%), 197.0 (45%), 121.0 (66%), 90.9 (100%).

#### 1-Hexyl-1H-imidazole (6c)

This compound was prepared by using 1-bromohexane (10.10 g, 8.60 mL, 61.2 mmole) to give pale yellow oil in 91% yield (8.48 g). Molecular Formula: C<sub>9</sub>H<sub>16</sub>N<sub>2</sub>; Mol. Wt.: 152.24; FTIR (cm<sup>-1</sup>): 3106 (C-H)<sub>Ar</sub>, 2955, 2929, 2858 (C-H)<sub>Aliph</sub>, 1506 (C=N), 1460 (C=C)<sub>Ar</sub>; <sup>1</sup>H-NMR (400 MHz, CDCl<sub>3</sub>) δ ppm: 7.29 (s, H, C-H<sub>Imidazole</sub>), 6.88 (s, H, C-H<sub>Imidazole</sub>), 6.75 (s, H, C-H<sub>Imidazole</sub>), 3.76 (t, *J* = 7.02 Hz, 2H, α-CH<sub>2</sub>), 1.64-1.56 (m, 2H, β-CH<sub>2</sub>), 1.13 (bs, 6H, bulk-CH<sub>2</sub>), 0.72 (t, *J* = 6.71 Hz, 3H, ω-CH<sub>3</sub>); <sup>13</sup>C-NMR (100 MHz, CDCl<sub>3</sub>) δ ppm: 136.95 (CH<sub>Imidazole</sub>), 129.19 (CH<sub>Imidazole</sub>), 118.75 (CH<sub>Imidazole</sub>), 46.91 (α-CH<sub>2</sub>), 31.17 (ω-2), 30.98 (bulk-CH<sub>2</sub>), 26.02 (β), 22.35 (ω-1), 13.90 (ω); EIMS (m/z): 152.1 (15%)(M), 137.0 (3%), 125.1 (35%), 109.1 (6%), 96.0 (19%), 84.0 (89%), 69.0 (23%), 49.0 (100%).

#### 1-Octyl-1H-imidazole (6d)

This compound was prepared by using 1-bromooctane (11.82 g, 10.65 mL, 61.2 mmole) to give pale yellow oil in 94% yield (10.37 g). Molecular Formula: C<sub>11</sub>H<sub>20</sub>N<sub>2</sub>; Mol. Wt.: 180.29; FTIR (cm<sup>-1</sup>): 3108 (C-H)<sub>Ar</sub>, 2958, 2925, 2855 (C-H)<sub>Aliph</sub>, 1677 (C=N), 1506, 1461 (C=C)<sub>Ar</sub>; <sup>1</sup>H-NMR (400 MHz, CDCl<sub>3</sub>) δ ppm: 7.32 (s, H, C-H<sub>Imidazole</sub>), 6.91 (s, H, C-H<sub>Imidazole</sub>), 6.77 (s, H, C-H<sub>Imidazole</sub>), 3.78 (t, *J* = 7.07 Hz, 2H, α-CH<sub>2</sub>), 1.66-1.59 (m, 2H, β-CH<sub>2</sub>), 1.15 (bs, 10H, bulk-CH<sub>2</sub>), 0.75 (t, *J* = 7.07 Hz, 3H, ω-CH<sub>3</sub>); <sup>13</sup>C-NMR (100 MHz, CDCl<sub>3</sub>) δ ppm: 137.04 (CH<sub>Imidazole</sub>), 129.28 (CH<sub>Imidazole</sub>), 118.77 (CH<sub>Imidazole</sub>), 47.01 (α-CH<sub>2</sub>), 31.72 (ω-2), 30.89, 29.09, 29.02 (bulk-CH<sub>2</sub>), 26.52 (β), 22.60 (ω-1), 14.06 (ω); EIMS (m/z): 180.1 (45%)(M), 165.1 (10%), 151.1 (24%), 137.1 (20%), 109.1 (36%), 96.0 (40%), 82.0 (100%), 69.0 (55%), 55.0 (25%), 43.1 (18%).

#### 1-Decyl-1H-imidazole (6e)

This compound was prepared by using 1-bromodecane (13.54 g, 12.65 mL, 61.2 mmole) to give pale yellow oil in 93% yield (11.86g). Molecular Formula: C<sub>13</sub>H<sub>24</sub>N<sub>2</sub>; Mol. Wt.: 208.34; FTIR (cm<sup>-1</sup>): 3107 (C-

## Supplementary Information: Tris-imidazolium and benzimidazolium ionic liquids: A new class of biodegradable surfactants

Nassir N. Al-Mohammed, Rusnah Syahila Duali Hussien, Yatimah Alias and Zanariah Abdullah

$^1\text{H-NMR}$  (400 MHz,  $\text{CDCl}_3$ )  $\delta$  ppm:  $\text{H}_{\text{Ar}}$ , 2956, 2925, 2855 (C-H) $_{\text{Aliph}}$ , 1678(C=N), 1506, 1461 (C=C) $_{\text{Ar}}$ ;  $^1\text{H-NMR}$  (400 MHz,  $\text{CDCl}_3$ )  $\delta$  ppm: 7.38 (s, H, C-H $_{\text{Imidazole}}$ ), 6.97 (s, H, C-H $_{\text{Imidazole}}$ ), 6.83 (s, H, C-H $_{\text{Imidazole}}$ ), 3.85 (t,  $J = 7.07$  Hz, 2H,  $\alpha$ -CH $_2$ ), 1.73-1.66 (m, 2H,  $\beta$ -CH $_2$ ), 1.19 (bs, 14H, bulk-CH $_2$ ), 0.81 (t,  $J = 7.07$ Hz, 3H,  $\omega$ -CH $_3$ );  $^{13}\text{C-NMR}$  (100 MHz,  $\text{CDCl}_3$ )  $\delta$  ppm: 137.07 (CH $_{\text{Imidazole}}$ ), 129.33 (CH $_{\text{Imidazole}}$ ), 118.79 (CH $_{\text{Imidazole}}$ ), 47.06 ( $\alpha$ -CH $_2$ ), 31.88 ( $\omega$ -2), 31.11, 29.50, 29.46, 29.28, 29.10 (bulk -CH $_2$ ), 26.57 ( $\beta$ ), 22.69 ( $\omega$ -1), 14.13( $\omega$ ); EIMS (m/z): 207.2 (32%)(M $^+$ ), 193.1 (9%), 179.1 (18%), 165.1 (14%), 151.1 (18%), 137.1 (23%), 123.1 (35%), 109.1 (28%), 96.0 (48%), 82.0 (100%), 69.0 (48%), 55.0 (45%), 43.1 (29%).

### 1-Dodecyl-1H-imidazole (6f)

This compound was prepared by using 1-bromododecane (15.25 g, 14.7 mL, 61.2 mmole) to give pale yellow oil in 96% yield (13.88 g). Molecular Formula:  $\text{C}_{15}\text{H}_{28}\text{N}_2$ ; Mol. Wt.: 236.40; FTIR ( $\text{cm}^{-1}$ ): 3010 (C-H) $_{\text{Ar}}$ , 2955, 2924, 2854 (C-H) $_{\text{Aliph}}$ , 1672 (C=N), 1505, 1495, 1452 (C=C) $_{\text{Ar}}$ ;  $^1\text{H-NMR}$  (400 MHz,  $\text{CDCl}_3$ )  $\delta$  ppm: 7.29 (s, H, C-H $_{\text{Imidazole}}$ ), 6.88 (s, H, C-H $_{\text{Imidazole}}$ ), 6.74 (s, H, C-H $_{\text{Imidazole}}$ ), 3.76 (t,  $J = 7.09$  Hz, 2H,  $\alpha$ -CH $_2$ ), 1.64-1.57 (m, 2H,  $\beta$ -CH $_2$ ), 1.11 (bs, 18H, bulk-CH $_2$ ), 0.74 (t,  $J = 7.09$  Hz, 3H,  $\omega$ -CH $_3$ );  $^{13}\text{C-NMR}$  (100 MHz,  $\text{CDCl}_3$ )  $\delta$  ppm: 136.26 (CH $_{\text{Imidazole}}$ ), 128.89 (CH $_{\text{Imidazole}}$ ), 118.34 (CH $_{\text{Imidazole}}$ ), 46.60 ( $\alpha$ -CH $_2$ ), 31.52 ( $\omega$ -2), 30.70, 29.22 (2), 29.13, 29.04, 28.95, 28.68 (bulk-CH $_2$ ), 26.15 ( $\beta$ ), 22.29 ( $\omega$ -1), 13.71 ( $\omega$ ); EIMS (m/z): 235.2 (40%)(M $^+$ ), 221.2 (32%), 207.2 (38%), 193.1 (22%), 179.1 (28%), 165.1 (14%), 151.1 (25%), 137.1 (18%), 123.1 (35%), 109.1 (30%), 96.0 (48%), 82.0 (100%), 69.0 (35%), 55.0 (45%), 43.1 (35%).

### 1-Benzyl-1H-imidazole (6g)

This compound was prepared by using benzyl bromide (10.47 g, 7.28 mL, 61.2 mmole) to give brown viscous syrup crystallized after 5-7 days. Re-crystallization from hexane gave off-white crystals in 86% yield (7.75 g); m.p 70-72°C. Molecular Formula:  $\text{C}_{10}\text{H}_{10}\text{N}_2$ ; Mol. Wt.: 158.20; FTIR ( $\text{cm}^{-1}$ ): 3113, 3028 (C-H) $_{\text{Ar}}$ , 2942 (C-H) $_{\text{Aliph}}$ , 1664, 1603, 1585 (C=N), 1505, 1495, 1449 (C=C) $_{\text{Ar}}$ ;  $^1\text{H-NMR}$  (400 MHz,  $\text{DMSO-d}_6$ )  $\delta$  ppm: 7.74 (s, H, C-H $_{\text{Imidazole}}$ ), 7.46-7.17 (m, 6H, 5H $_{\text{Ar}}$ , C-H $_{\text{Imidazole}}$ ), 6.90 (s, H, C-H $_{\text{Imidazole}}$ ), 5.18 (s, 2H, Ar-CH $_2$ -N);  $^{13}\text{C-NMR}$  (100 MHz,  $\text{DMSO-d}_6$ )  $\delta$  ppm: 137.91 (-C $_{\text{Ar}}$ -CH $_2$ -), 137.80 (CH $_{\text{Imidazole}}$ ), 129.22 (2CH $_{\text{Ar}}$ ), 128.89 (CH $_{\text{Imidazole}}$ ), 128.35 (CH $_{\text{Ar}}$ ), 128.05 (2CH $_{\text{Ar}}$ ), 120.19 (CH $_{\text{Imidazole}}$ ), 50.13 (Ar-CH $_2$ -); EIMS (m/z): 158.0 (15%)(M), 131.0 (10%), 118.0 (15%), 104.0 (11%), 91.0 (100%), 77.0 (7.5%), 65.0 (14%).

### 1-Butyl-1H-benzimidazole (7b)

This compound was prepared by using 1-bromobutane (8.38 g, 6.57 mL, 61.2 mmole) to give yellow oil in 83% yield (8.84 g). Molecular Formula:  $\text{C}_{11}\text{H}_{14}\text{N}_2$ ; Mol. Wt.: 174.24; FTIR ( $\text{cm}^{-1}$ ): 3055 (C-H) $_{\text{Ar}}$ , 2955, 2930, 2855 (C-H) $_{\text{Aliph}}$ , 1612 (C=N), 1494, 1450 (C=C) $_{\text{Ar}}$ ;  $^1\text{H-NMR}$  (400 MHz,  $\text{DMSO-d}_6$ )  $\delta$  ppm: 8.21 (s, H, C-H $_{\text{BImidazole}}$ ), 7.64 (d,  $J = 8.05$  Hz, H, C-H $_{\text{Ar}}$ ), 7.58 (d,  $J = 8.05$  Hz, H, C-H $_{\text{Ar}}$ ), 7.26-7.16 (m, 2H, CH $_{\text{Ar}}$ ), 4.23 (t,  $J = 7.07$  Hz, 2H,  $\alpha$ -CH $_2$ ), 1.72-1.79 (m, 2H,  $\beta$ -CH $_2$ ), 1.28-1.18 (m, 2H, ( $\omega$ -1)), 0.87 (t,  $J = 7.23$  Hz, 3H,  $\omega$ -CH $_3$ );  $^{13}\text{C-NMR}$  (100 MHz,  $\text{DMSO-d}_6$ )  $\delta$  ppm: 144.49 (CH $_{\text{BImidazole}}$ ), 144.07 (C $_{\text{Ar}}$ ), 134.35 (C $_{\text{Ar}}$ ), 122.68 (CH $_{\text{Ar}}$ ), 121.85 (CH $_{\text{Ar}}$ ), 119.97 (CH $_{\text{Ar}}$ ), 110.82 (CH $_{\text{Ar}}$ ), 44.30 ( $\alpha$ -CH $_2$ ), 31.98 ( $\omega$ -2), 19.87 ( $\omega$ -1),

## Supplementary Information: Tris-imidazolium and benzimidazolium ionic liquids: A new class of biodegradable surfactants

Nassir N. Al-Mohammed, Rusnah Syahila Duali Hussien, Yatimah Alias and Zanariah Abdullah

13.86 ( $\omega$ ); EIMS (m/z): 174.1 (50%)(M), 159.0 (12%), 145.0 (18%), 131.0 (100%), 118.0 (30%), 104.0 (12%), 90.0 (10%) 77.0 (25%).

### 1-Hexyl-1H-benzimidazole (7c)

This compound was prepared by using 1-bromohexane (10.10 g, 8.63 mL, 61.2 mmole) to give yellow oil in 88% yield (10.90 g). Molecular Formula: C<sub>13</sub>H<sub>18</sub>N<sub>2</sub>; Mol. Wt.: 202.30; FTIR (cm<sup>-1</sup>): 3058 (C-H)<sub>Ar</sub>, 2954, 2928, 2857 (C-H)<sub>Aliph</sub>, 1615 (C=N), 1494, 1457 (C=C)<sub>Ar</sub>; <sup>1</sup>H-NMR (400 MHz, DMSO-d<sub>6</sub>)  $\delta$  ppm: 8.23 (s, H, C-H<sub>BImidazole</sub>), 7.69 (d,  $J$  = 7.56 Hz, H, C-H<sub>Ar</sub>), 7.54 (d,  $J$  = 7.56 Hz, H, C-H<sub>Ar</sub>), 7.25-7.17 (m, 2H, CH<sub>Ar</sub>), 4.18 (t,  $J$  = 7.07 Hz, 2H,  $\alpha$ -CH<sub>2</sub>), 1.76-1.69 (m,  $\beta$ -CH<sub>2</sub>), 1.18 (bs, 6H, bulk-CH<sub>2</sub>), 0.78 (t,  $J$  = 6.34 Hz, 3H,  $\omega$ -CH<sub>3</sub>); <sup>13</sup>C-NMR (100 MHz, DMSO-d<sub>6</sub>)  $\delta$  ppm: 143.86 (CH<sub>BImidazole</sub>), 143.55 (C<sub>Ar</sub>), 133.77 (C<sub>Ar</sub>), 122.05 (CH<sub>Ar</sub>), 121.22 (CH<sub>Ar</sub>), 119.40 (CH<sub>Ar</sub>), 110.17 (CH<sub>Ar</sub>), 44.02 ( $\alpha$ -CH<sub>2</sub>), 30.67 ( $\omega$ -2), 29.32 (bulk-CH<sub>2</sub>), 25.73 ( $\beta$ ), 21.93 ( $\omega$ -1), 13.78 ( $\omega$ ); EIMS (m/z): 202.1 (43%)(M), 187.1 (5%), 173.1 (18%), 159.0 (15%), 145.0 (15%), 131.0 (100%), 118.0 (19%), 104.0 (12%), 90.0 (7%) 77.0 (17%).

### 1-Octyl-1H-benzimidazole (7d)

This compound was prepared by using 1-bromooctane (11.82 g, 10.65 mL, 61.2 mmole) to give yellow oil in 90% yield (12.69 g). Molecular Formula: C<sub>15</sub>H<sub>22</sub>N<sub>2</sub>; Mol. Wt.: 230.35; FTIR (cm<sup>-1</sup>): 3058(C-H)<sub>Ar</sub>, 2955, 2925, 2854 (C-H)<sub>Aliph</sub>, 1615 (C=N), 1494, 1458 (C=C)<sub>Ar</sub>; <sup>1</sup>H-NMR (400 MHz, DMSO-d<sub>6</sub>)  $\delta$  ppm: 8.21 (s, H, C-H<sub>BImidazole</sub>), 7.64 (d,  $J$  = 7.07 Hz, H, C-H<sub>Ar</sub>), 7.56 (d,  $J$  = 7.07 Hz, H, C-H<sub>Ar</sub>), 7.25-7.16 (m, 2H, CH<sub>Ar</sub>), 4.20 (t,  $J$  = 7.07 Hz, 2H,  $\alpha$ -CH<sub>2</sub>), 1.79-1.72 (m,  $\beta$ -CH<sub>2</sub>), 1.17 (bs, 10H, bulk-CH<sub>2</sub>), 0.80 (t,  $J$  = 7.07 Hz, 3H,  $\omega$ -CH<sub>3</sub>); <sup>13</sup>C-NMR (100 MHz, DMSO-d<sub>6</sub>)  $\delta$  ppm: 144.39 (CH<sub>BImidazole</sub>), 144.06 (C<sub>Ar</sub>), 134.29 (C<sub>Ar</sub>), 122.60 (CH<sub>Ar</sub>), 121.77 (CH<sub>Ar</sub>), 119.94 (CH<sub>Ar</sub>), 110.69 (CH<sub>Ar</sub>), 44.58 ( $\alpha$ -CH<sub>2</sub>), 31.72 ( $\omega$ -2), 29.92, 29.14, 29.05 (bulk-CH<sub>2</sub>), 26.66 ( $\beta$ ), 22.59 ( $\omega$ -1), 14.32 ( $\omega$ ); EIMS (m/z): 230.1 (40%)(M), 215.1 (9%), 201.1 (12%), 187.1 (24%), 173.1 (39%), 159.0 (25%), 145.0 (39%), 131.0 (100%), 118.0 (47%), 104.0 (17%), 90.0 (9%), 77.0 (22%).

### 1-Decyl-1H-benzimidazole (7e)

This compound was prepared by using 1-bromodecane (13.53 g, 12.65 mL, 61.2 mmole) to give a yellow semi-solid in 91% yield (14.38 g). Molecular Formula: C<sub>17</sub>H<sub>26</sub>N<sub>2</sub>; Mol. Wt.: 258.40; FTIR (cm<sup>-1</sup>): 3057 (C-H)<sub>Ar</sub>, 2954, 2923, 2853 (C-H)<sub>Aliph</sub>, 1615 (C=N), 1494,1458 (C=C)<sub>Ar</sub>; <sup>1</sup>H-NMR (400 MHz, DMSO-d<sub>6</sub>)  $\delta$  ppm: 8.20 (s, H, C-H<sub>BImidazole</sub>), 7.64 (d,  $J$  = 7.32 Hz, H, C-H<sub>Ar</sub>), 7.56 (d,  $J$  = 7.32 Hz, H, C-H<sub>Ar</sub>), 7.25-7.16 (m, 2H, CH<sub>Ar</sub>), 4.21 (t,  $J$  = 7.16 Hz, 2H,  $\alpha$ -CH<sub>2</sub>), 1.79- 1.72 (m, 2H,  $\beta$ -CH<sub>2</sub>), 1.18 (bs, 14H, bulk-CH<sub>2</sub>), 0.82 (t,  $J$  = 7.07 Hz, 3H,  $\omega$ -CH<sub>3</sub>); <sup>13</sup>C-NMR (100 MHz, DMSO-d<sub>6</sub>)  $\delta$  ppm: 144.34 (CH<sub>BImidazole</sub>), 143.40 (C<sub>Ar</sub>), 134.05 (C<sub>Ar</sub>), 122.93 (CH<sub>Ar</sub>), 122.13 (CH<sub>Ar</sub>), 119.73 (CH<sub>Ar</sub>), 110.82 (CH<sub>Ar</sub>), 44.63 ( $\alpha$ -CH<sub>2</sub>), 31.65 ( $\omega$ -2), 29.69, 29.56, 29.24, 29.02, 28.88 (bulk-CH<sub>2</sub>), 26.43 ( $\beta$ ), 22.48 ( $\omega$ -1), 14.30 ( $\omega$ ); EIMS (m/z): 258.2 (60%)(M), 243.2 (16%), 229.1 (32%), 215.1 (27%), 201.1 (30%), 187.1 (36%), 173.1 (53%), 159.1 (39%), 145.0 (50%), 131.0 (100%), 118.0 (70%), 104.0 (21%), 90.0 (10%), 77.0 (25%).

## Supplementary Information: Tris-imidazolium and benzimidazolium ionic liquids: A new class of biodegradable surfactants

Nassir N. Al-Mohammed, Rusnah Syahila Duali Hussien, Yatimah Alias and Zanariah Abdullah

### 1-Dodecyl-1H-benzimidazole (7f)

This compound was prepared by using 1-bromododecane (15.25 g, 14.70 mL, 61.2 mmole) to give yellow semi-solid in 94% yield (16.48 g). Molecular Formula: C<sub>19</sub>H<sub>30</sub>N<sub>2</sub>; Mol. Wt.: 286.45; FTIR (cm<sup>-1</sup>): 3055 (C-H)<sub>Ar</sub>, 2958, 2924, 2857 (C-H)<sub>Aliph</sub>, 1612 (C=N), 1496, 1458 (C=C)<sub>Ar</sub>; <sup>1</sup>H-NMR (400 MHz, CDCl<sub>3</sub>) δ ppm: 7.84 (s, H, C-H<sub>BImidazole</sub>), 7.82-7.77 (m, H, C-H<sub>Ar</sub>), 7.37-7.34 (m, H, C-H<sub>Ar</sub>), 7.29-7.23 (m, 2H, CH<sub>Ar</sub>), 4.09 (t, *J*= 7.09 Hz, 2H, α-CH<sub>2</sub>), 1.87-1.80 (m, 2H, β-CH<sub>2</sub>), 1.23 (bs, 18H, (bulk-CH<sub>2</sub>)), 0.87 (t, *J*= 7.09 Hz, 3H, ω-CH<sub>3</sub>). <sup>13</sup>C-NMR (100 MHz, CDCl<sub>3</sub>) δ ppm: 143.75 (C<sub>Ar</sub>), 142.74 (CH<sub>BImidazole</sub>), 133.68 (C<sub>Ar</sub>), 122.57 (CH<sub>Ar</sub>), 121.78 (CH<sub>Ar</sub>), 120.17 (CH<sub>Ar</sub>), 109.49 (CH<sub>Ar</sub>), 44.89 (α-CH<sub>2</sub>), 31.74 (ω-2), 29.62, 29.42 (2), 29.43, 29.25, 29.16, 28.91 (bulk-CH<sub>2</sub>), 26.63 (β), 22.51 (ω-1), 13.94 (ω). EIMS (m/z): 286.2 (62%)(M), 271.2 (18%), 257.2 (30%), 243.2 (32%), 229.1 (30%), 215.1 (32%), 201.1 (57%), 187.1 (40%), 173.1 (50%), 159.1 (40%), 145.0 (55%), 131.0 (100%), 118.0 (60%), 104.0 (21%), 90.0 (10%), 77.0 (20%).

### 1-Benzyl-1H-benzimidazole (7g)

This compound was prepared by using benzyl bromide (10.47 g, 7.28 mL, 61.2 mmole) to give a brown solid re-crystallized from hexane gave off-white crystals in 90% yield (11.47 g); m.p 108-110°C. Molecular Formula: C<sub>14</sub>H<sub>12</sub>N<sub>2</sub>; Mol. Wt.: 208.26; FTIR (cm<sup>-1</sup>): 3081, 3032 (C-H)<sub>Ar</sub>, 2944 (C-H)<sub>Aliph</sub>, 1666, 1613 (C=N), 1493, 1451, 1442 (C=C)<sub>Ar</sub>; <sup>1</sup>H-NMR (400 MHz, DMSO-d<sub>6</sub>) δ ppm: 8.41 (s, H, C-H<sub>BImidazole</sub>), 7.67-7.64 (m, H, C-H<sub>Ar</sub>), 7.51-7.49 (m, H, C-H<sub>Ar</sub>), 7.34-7.14 (m, 7H, C-H<sub>Ar</sub>), 5.49 (s, 2H, Ar-CH<sub>2</sub>-N); <sup>13</sup>C-NMR (100 MHz, DMSO-d<sub>6</sub>) δ ppm: 144.21 (CH<sub>BImidazole</sub>), 143.57 (C<sub>BImidazole</sub>), 136.93 (-C<sub>Ar</sub>-CH<sub>2</sub>-), 133.65 (C<sub>BImidazole</sub>), 128.67 (2CH<sub>Ar</sub>), 127.70 (CH<sub>Ar</sub>), 127.35 (2CH<sub>Ar</sub>), 122.37 (CH<sub>BImidazole</sub>), 121.56 (CH<sub>BImidazole</sub>), 119.48 (CH<sub>BImidazole</sub>), 110.67 (CH<sub>BImidazole</sub>), 47.60 (Ar-CH<sub>2</sub>-); EIMS (m/z): 208.1 (58%)(M), 103.0 (3%), 91.1 (100%), 77.0 (3%), 65.0 (13%).

### Tris-((N-butyl-imidazoliumyl-acetayloxy)methyl)ethane chloride (8b)

This compound was prepared analogously to **8a** using tris-((2-chloro-acetayloxy)methyl)ethane (compound **3**) (1.9 g, 5.43 mmol) and 1-butylimidazole (2.02 g, 2.14 mL, 16.3 mmol) to provide a viscous hygroscopic syrup in 98% yield (3.85 g). Molecular Formula: C<sub>32</sub>H<sub>51</sub>Cl<sub>3</sub>N<sub>6</sub>O<sub>6</sub>; Mol. Wt.: 722.14; FTIR (cm<sup>-1</sup>): 3058 (C-H)<sub>Ar</sub>, 2959, 2933, 2873 (C-H)<sub>Aliph</sub>, 1748 (C=O), 1632 (C=N), 1564, 1464 (C=C)<sub>Ar</sub>, 1199, 1165 (C-O); <sup>1</sup>H-NMR (400 MHz, DMSO-d<sub>6</sub>) δ ppm: 9.56 (bt~s, 3H, C-H<sub>Imidazole</sub>, major), 9.51 (bt~s, 3H, C-H<sub>Imidazole</sub>, minor), 9.46 (bt~s, 3H, C-H<sub>Imidazole</sub>, minor), 7.89 (dt, *J*=6.83, 1.71 Hz, 6H, C-H<sub>Imidazole</sub>, major), 7.85 (dt, *J*=6.83, 1.71 Hz, 6H, C-H<sub>Imidazole</sub>, minor), 5.45 (s, 6H, O-CH<sub>2</sub>, major), 5.40 (s, 6H, O-CH<sub>2</sub>, minor), 4.25 (t, *J*= 7.07 Hz, 6H, α-CH<sub>2</sub>, major), 4.04 (s, 6H, N-CH<sub>2</sub>), 3.95 (t, *J*= 7.07 Hz, 6H, α-CH<sub>2</sub>, minor), 1.80-1.73 (m, 6H, β-CH<sub>2</sub>, major), 1.69-1.62 (m, 6H, β-CH<sub>2</sub>, minor), 1.28-1.14 (m, 6H, (ω-1)), 0.93 (s, 3H, CH<sub>3</sub>), 0.88 (t, *J*=7.32 Hz, 9H, ω-CH<sub>3</sub>); <sup>13</sup>C-NMR (100 MHz, DMSO-d<sub>6</sub>) δ ppm: 166.72 (C=O), 137.44 (CH<sub>Imidazole</sub>, major), 137.06 (CH<sub>Imidazole</sub>, minor), 123.95 (CH<sub>Imidazole</sub>), 122.14 (CH<sub>Imidazole</sub>), 66.54 (CH<sub>2</sub>-O), 49.60 (CH<sub>2</sub>-N), 48.78 (α-CH<sub>2</sub>), 38.16 (-C-), 32.56 ((ω-2), minor), 31.40 ((ω-2), major), 19.14 ((ω-1), minor), 18.79 ((ω-1), major), 16.38 (CH<sub>3</sub>), 13.42 ((ω), minor), 13.32 ((ω), major); HRMS: m/z, [M<sup>+3</sup>-2H]-3Cl<sup>-</sup> calcd. for C<sub>32</sub>H<sub>49</sub>N<sub>6</sub>O<sub>6</sub><sup>5+</sup>: 613.3714, found: 613.3748.

## Supplementary Information: Tris-imidazolium and benzimidazolium ionic liquids: A new class of biodegradable surfactants

Nassir N. Al-Mohammed, Rusnah Syahila Duali Hussien, Yatimah Alias and Zanariah Abdullah

### Tris-((*N*-octyl-imidazoliumyl-acetayloxy)methyl)ethane chloride (**8d**)

This compound was prepared analogously to **8a** using tris-((2-chloro-acetayloxy)methyl)ethane (compound **3**) (1.9 g, 5.43 mmol) and 1-octylimidazole (**6d**) (2.94 g, 16.3 mmol) to provide a viscous hygroscopic syrup in 97% yield (4.70 g). Molecular Formula: C<sub>44</sub>H<sub>75</sub>Cl<sub>3</sub>N<sub>6</sub>O<sub>6</sub>; Mol. Wt.: 890.46; FTIR (cm<sup>-1</sup>): 3058 (C-H)<sub>Ar</sub>, 2955, 2925, 2855 (C-H)<sub>Aliph</sub>, 1749 (C=O), 1668 (C=N), 1564, 1464 (C=C)<sub>Ar</sub>, 1199, 1167 (C-O); <sup>1</sup>H-NMR (400 MHz, DMSO-*d*<sub>6</sub>) δ ppm: 9.55 (bt~s, 3H, C-H<sub>Imidazole</sub>, major), 9.48 (bt~s, 3H, C-H<sub>Imidazole</sub>, minor), 9.41 (bt~s, 3H, C-H<sub>Imidazole</sub>, minor), 7.89 (dt, 6H, *J*=8.86, 1.72 Hz, C-H<sub>Imidazole</sub>, major), 7.85 (dt, 6H, *J*=8.86, 1.72 Hz, C-H<sub>Imidazole</sub>, minor), 5.45 (s, 6H, O-CH<sub>2</sub>, major), 5.39 (s, 6H, O-CH<sub>2</sub>, minor), 5.37 (s, 6H, O-CH<sub>2</sub>, minor), 4.24 (t, *J*=7.15 Hz, 6H, α-CH<sub>2</sub>), 4.06 (bs, 6H, N-CH<sub>2</sub>), 1.82-1.74 (m, 6H, β-CH<sub>2</sub>), 1.24 (bs, 30H, bulk-CH<sub>2</sub>), 0.95 (s, 3H, CH<sub>3</sub>), 0.85 (t, *J*=6.98 Hz, 9H, ω-CH<sub>3</sub>); <sup>13</sup>C-NMR (100 MHz, DMSO-*d*<sub>6</sub>) δ ppm: 167.99 (C=O, major), 166.85 (C=O, minor), 137.31 (CH<sub>Imidazole</sub>, minor), 137.21 (CH<sub>Imidazole</sub>, major), 123.87 (CH<sub>Imidazole</sub>), 122.05 (CH<sub>Imidazole</sub>, minor), 121.91 (CH<sub>Imidazole</sub>, major), 63.92 (CH<sub>2</sub>-O, major), 63.05 (CH<sub>2</sub>-O, minor), 49.75 (CH<sub>2</sub>-N, major), 49.63 (CH<sub>2</sub>-N, minor), 48.94 (α-CH<sub>2</sub>, minor), 48.87 (α-CH<sub>2</sub>, major), 40.62 (-C-), 31.10 (ω-2), 29.34, 28.44, 28.26 (bulk-CH<sub>2</sub>), 25.39 (β), 22.01 (ω-1), 16.57 (CH<sub>3</sub>, major), 16.42 (CH<sub>3</sub>, minor), 13.89 (ω); HRMS: *m/z*, [M<sup>+3</sup>-2H]-3Cl<sup>-</sup> calcd. for C<sub>44</sub>H<sub>73</sub>N<sub>6</sub>O<sub>6</sub><sup>5+</sup>: 781.5592, found: 781.5608.

### Tris-((*N*-decyl-imidazoliumyl-acetayloxy)methyl)ethane chloride (**8e**)

This compound was prepared analogously to **8a** using tris-((2-chloro-acetayloxy)methyl)ethane (compound **3**) (1.9 g, 5.43 mmol) and 1-decylimidazole (**6e**) (3.39 g, 16.3 mmol) to provide a viscous hygroscopic syrup in 99% yield (5.24 g). Molecular Formula: C<sub>50</sub>H<sub>87</sub>Cl<sub>3</sub>N<sub>6</sub>O<sub>6</sub>; Mol. Wt.: 974.62; FTIR (cm<sup>-1</sup>): 3058 (C-H)<sub>Ar</sub>, 2955, 2929, 2857 (C-H)<sub>Aliph</sub>, 1749 (C=O), 1666 (C=N), 1564, 1462 (C=C)<sub>Ar</sub>, 1199, 1165 (C-O); <sup>1</sup>H-NMR (400 MHz, DMSO-*d*<sub>6</sub>) δ ppm: 9.64 (bt~s, 3H, C-H<sub>Imidazole</sub>, major), 9.57 (bt~s, 3H, C-H<sub>Imidazole</sub>, minor), 9.51 (bt~s, 3H, C-H<sub>Imidazole</sub>, minor), 7.94 (t, *J*=1.81 Hz, 6H, C-H<sub>Imidazole</sub>, major), 7.89 (t, *J*=1.81 Hz, 6H, C-H<sub>Imidazole</sub>, major), 7.84 (t, *J*=1.81 Hz, 6H, C-H<sub>Imidazole</sub>, minor), 7.81 (t, *J*=1.81 Hz, 6H, C-H<sub>Imidazole</sub>, minor), 5.49 (s, 6H, O-CH<sub>2</sub>, major), 5.45 (s, 6H, O-CH<sub>2</sub>, minor), 5.40 (s, 6H, O-CH<sub>2</sub>, minor), 4.25 (t, *J*=7.25 Hz, 6H, α-CH<sub>2</sub>, major), 4.05 (s, 6H, N-CH<sub>2</sub>), 4.01 (t, 6H, *J*=7.25 Hz, α-CH<sub>2</sub>, minor), 1.82-1.75 (m, 6H, β-CH<sub>2</sub>, major), 1.73-1.67 (m, 6H, β-CH<sub>2</sub>, minor), 1.24 (bs, 42H, bulk-CH<sub>2</sub>), 0.95 (s, 3H, CH<sub>3</sub>), 0.84 (t, 9H, *J*=6.80 Hz, ω-CH<sub>3</sub>); <sup>13</sup>C-NMR (100 MHz, DMSO-*d*<sub>6</sub>) δ ppm: 166.72 (C=O), 137.41 (CH<sub>Imidazole</sub>, major), 136.42 (CH<sub>Imidazole</sub>, minor), 123.91 (CH<sub>Imidazole</sub>), 122.04 (CH<sub>Imidazole</sub>), 66.48 (CH<sub>2</sub>-O), 49.52 (CH<sub>2</sub>-N), 48.92 (α-CH<sub>2</sub>), 38.08 (-C-), 31.15 (ω-2), 30.16 (minor), 29.40 (major), 28.53, 28.49, 28.37, 28.31 (bulk-CH<sub>2</sub>), 25.76 (β, minor), 25.47 (β, major), 22.05 (ω-1), 16.39 (CH<sub>3</sub>), 13.93 (ω); HRMS: *m/z*, [M<sup>+3</sup>-2H]-3Cl<sup>-</sup> calcd. for C<sub>50</sub>H<sub>85</sub>N<sub>6</sub>O<sub>6</sub><sup>5+</sup>: 865.6531, found: 865.6518.

### Tris-((*N*-hexyl-benzimidazoliumyl-acetayloxy)methyl)ethane chloride (**9c**)

This compound was prepared analogously to **9b** using tris-((2-chloro-acetayloxy)methyl)ethane (compound **3**) (1.9 g, 5.43 mmol) and 1-hexyl-benzimidazole (**7c**) (3.30 g, 16.3 mmol) to provide a viscous hygroscopic syrup in 99% yield (5.15 g). Molecular Formula: C<sub>50</sub>H<sub>69</sub>Cl<sub>3</sub>N<sub>6</sub>O<sub>6</sub>; Mol. Wt.: 956.48; FTIR (cm<sup>-1</sup>): 3020 (C-H)<sub>Ar</sub>, 2954, 2929, 2859 (C-H)<sub>Aliph</sub>, 1748 (C=O), 1617 (C=N), 1563, 1486, 1464 (C=C)<sub>Ar</sub>, 1196, 1160 (C-O); <sup>1</sup>H-NMR (400 MHz, DMSO-*d*<sub>6</sub>) δ ppm: 10.39 (s, 3H, C-H<sub>Blimidazole</sub>, major),

## Supplementary Information: Tris-imidazolium and benzimidazolium ionic liquids: A new class of biodegradable surfactants

Nassir N. Al-Mohammed, Rusnah Syahila Duali Hussien, Yatimah Alias and Zanariah Abdullah

10.32 (s, 3H, C-H<sub>Blmidazole</sub>, minor), 10.26 (s, 3H, C-H<sub>Blmidazole</sub>, minor), 8.15-8.09 (m, 6H, CH<sub>Ar</sub>), 7.70-7.61 (m, 6H, CH<sub>Ar</sub>, major), 7.31-7.24 (m, 6H, CH<sub>Ar</sub>, minor), 5.85 (s, 6H, O-CH<sub>2</sub>, major), 5.80 (s, 6H, O-CH<sub>2</sub>, minor), 4.57 (t, *J*=7.07, 6H, α-CH<sub>2</sub>, major), 4.29 (t, *J*=7.07, 6H, α-CH<sub>2</sub>, minor), 4.03 (s, 6H, N-CH<sub>2</sub>, minor), 3.99 (s, 6H, N-CH<sub>2</sub>, major), 1.92-1.84 (m, 6H, β-CH<sub>2</sub>), 1.26 (bs, 18H, bulk-CH<sub>2</sub>), 0.86 (s, 3H, CH<sub>3</sub>), 0.82 (t, 9H, overlap, ω-CH<sub>3</sub>); <sup>13</sup>C-NMR (100 MHz, DMSO-d<sub>6</sub>) δ ppm: 167.13 (C=O, minor), 166.41 (C=O, major), 143.37 (CH<sub>Blmidazole</sub>), 131.50 (C<sub>Ar</sub>), 130.61 (C<sub>Ar</sub>), 126.74 (CH<sub>Ar</sub>), 126.66 (CH<sub>Ar</sub>), 114.10 (CH<sub>Ar</sub>), 113.75 (CH<sub>Ar</sub>), 66.29 (CH<sub>2</sub>-O), 47.55 (CH<sub>2</sub>-N), 46.80 (α-CH<sub>2</sub>), 38.13 (-C-), 30.56 (ω-2), 28.49 (bulk-CH<sub>2</sub>), 25.64 (β, minor), 25.32 (β, major), 21.87 (ω-1), 16.16 (CH<sub>3</sub>, major), 16.09 (CH<sub>3</sub>, minor), 13.79 (ω); HRMS: *m/z*, [M<sup>+3</sup>-2H]-3Cl<sup>-</sup> calcd. for C<sub>50</sub>H<sub>67</sub>N<sub>6</sub>O<sub>6</sub><sup>5+</sup>: 847.5122, found: 847.5162.

### Tris-((*N*-octyl-benzimidazoliumyl-acetayloxy)methyl)ethane chloride (**9d**)

This compound was prepared analogously to **9b** using tris-((2-chloro-acetayloxy)methyl)ethane (compound **3**) (1.9 g, 5.43 mmol) and 1-octyl-benzimidazole (**7d**) (3.75 g, 16.3 mmol) to provide a viscous hygroscopic syrup in 98% yield (5.54g). Molecular Formula: C<sub>56</sub>H<sub>81</sub>Cl<sub>3</sub>N<sub>6</sub>O<sub>6</sub>; Mol. Wt.: 1040.64; FTIR (cm<sup>-1</sup>): 3134 (C-H)<sub>Ar</sub>, 2955, 2925, 2855 (C-H)<sub>Aliph</sub>, 1749 (C=O), 1618 (C=N), 1562, 1486 1462 (C=C)<sub>Ar</sub>, 1199 (C-O); <sup>1</sup>H-NMR (400 MHz, DMSO-d<sub>6</sub>) δ ppm: 10.39 (s, 3H, C-H<sub>Blmidazole</sub>, major), 10.32 (s, 3H, C-H<sub>Blmidazole</sub>, minor), 10.26 (s, 3H, C-H<sub>Blmidazole</sub>, minor), 8.16-8.10 (m, 6H, CH<sub>Ar</sub>), 7.70-7.61 (m, 6H, CH<sub>Ar</sub>, major), 7.29-7.19 (m, 6H, CH<sub>Ar</sub>, minor), 5.85 (s, 6H, O-CH<sub>2</sub>, major), 5.80 (s, 6H, O-CH<sub>2</sub>, minor), 4.57 (t, *J*=7.07, 6H, α-CH<sub>2</sub>, major), 4.25 (t, *J*=7.07, 6H, α-CH<sub>2</sub>, minor), 4.04 (s, 6H, N-CH<sub>2</sub>, minor), 3.99 (s, 6H, N-CH<sub>2</sub>, major), 1.92- 1.85 (m, 6H, β-CH<sub>2</sub>), 1.20 (bs, 30H, bulk-CH<sub>2</sub>), 0.86 (s, 3H, CH<sub>3</sub>), 0.82 (t, 9H, *J*=6.80, ω-CH<sub>3</sub>); <sup>13</sup>C-NMR (100 MHz, DMSO-d<sub>6</sub>) δ ppm: 167.83 (C=O, major), 166.51 (C=O, minor), 143.22 (CH<sub>Blmidazole</sub>), 131.56 (C<sub>Ar</sub>), 130.62 (C<sub>Ar</sub>), 126.79 (CH<sub>Ar</sub>), 126.57 (CH<sub>Ar</sub>), 113.86 (CH<sub>Ar</sub>), 113.71 (CH<sub>Ar</sub>), 64.02 (CH<sub>2</sub>-O, major), 63.13 (CH<sub>2</sub>-O, minor), 47.54 (CH<sub>2</sub>-N), 46.77 (α-CH<sub>2</sub>), 40.58 (-C-), 31.08 (ω-2), 28.42 (2), 28.31 (bulk-CH<sub>2</sub>), 25.61 (β), 21.98 (ω-1), 16.55 (CH<sub>3</sub>, major), 16.32 (CH<sub>3</sub>, minor), 13.88 (ω); HRMS: *m/z*, [M<sup>+3</sup>-2H]-3Cl<sup>-</sup> calcd. for C<sub>56</sub>H<sub>79</sub>N<sub>6</sub>O<sub>6</sub><sup>5+</sup>: 931.6061, found: 931.6144.

### Tris-((*N*-benzyl-benzimidazoliumyl-acetayloxy)methyl)ethane chloride (**9g**)

This compound was prepared analogously to **9b** using tris-((2-chloro-acetayloxy)methyl)ethane (compound **3**) (1.9 g, 5.43 mmol) and 1-benzyl-benzimidazole (**7g**) (3.39 g, 16.3 mmol) to provide a pale yellow hygroscopic semi-solid in 96% yield (5.08g). Molecular Formula: C<sub>53</sub>H<sub>51</sub>Cl<sub>3</sub>N<sub>6</sub>O<sub>6</sub>; Mol. Wt.: 974.37 ; FTIR (cm<sup>-1</sup>): 3120 (C-H)<sub>Ar</sub>, 2974 (C-H)<sub>Aliph</sub>, 1750 (C=O), 1615 (C=N), 1562, 1486, 1455 (C=C)<sub>Ar</sub>, 1190, 1165 (C-O); <sup>1</sup>H-NMR (400 MHz, DMSO-d<sub>6</sub>) δ ppm: 10.30 (s, 3H, C-H<sub>Blmidazole</sub>, major), 10.23 (s, 3H, C-H<sub>Blmidazole</sub>, minor), 10.17 (s, 3H, C-H<sub>Blmidazole</sub>, minor), 8.05 (d, *J*=8.31 Hz, 3H, C-H<sub>Ar</sub>), 7.99 (d, *J*=8.31 Hz, 3H, C-H<sub>Ar</sub>), 7.63-7.51 (m, 12H, C-H<sub>Ar</sub>), 7.41-7.31 (m, 9H, C-H<sub>Ar</sub>), 5.89 (s, 6H, CH<sub>2</sub>-Ar), 5.78 (s, 6H, O-CH<sub>2</sub>, major), 5.74 (s, 6H, O-CH<sub>2</sub>, minor), 5.67 (s, 6H, O-CH<sub>2</sub>, minor), 4.03 (s, 6H, N-CH<sub>2</sub>, major), 3.97 (s, 6H, N-CH<sub>2</sub>, minor), 0.88 (s, 3H, CH<sub>3</sub>, minor), 0.85 (s, 3H, minor), 0.81 (s, 3H, CH<sub>3</sub>, major); <sup>13</sup>C-NMR (100 MHz, DMSO-d<sub>6</sub>) δ ppm: 167.19 (C=O, minor), 166.45 (C=O, major), 143.97 (CH<sub>Blmidazole</sub>, minor), 143.66 (CH<sub>Blmidazole</sub>, major), 133.93 (-C<sub>Ar</sub>-CH<sub>2</sub>-), 131.65 (C<sub>Blmidazole</sub>), 130.34 (C<sub>Blmidazole</sub>), 129.00 (2×CH<sub>Ar</sub>), 128.77 (CH<sub>Ar</sub>, major), 128.70 (CH<sub>Ar</sub>, minor), 128.35 (2×CH<sub>Ar</sub>), 126.90 (CH<sub>Blmidazole</sub>), 126.84 (CH<sub>Blmidazole</sub>), 114.20 (CH<sub>Blmidazole</sub>), 113.96 (CH<sub>Blmidazole</sub>), 66.36 (CH<sub>2</sub>-O, major),

## Supplementary Information: Tris-imidazolium and benzimidazolium ionic liquids: A new class of biodegradable surfactants

Nassir N. Al-Mohammed, Rusnah Syahila Duali Hussien, Yatimah Alias and Zanariah Abdullah

66.19 (CH<sub>2</sub>-O, minor), 49.93 (CH<sub>2</sub>-N), 47.84 (Ar-CH<sub>2</sub>-, minor), 47.20 (Ar-CH<sub>2</sub>-, major), 38.30 (-C-), 16.21 (CH<sub>3</sub>, minor), 16.13 (CH<sub>3</sub>, major); HRMS: m/z, [M<sup>+3</sup>-2H]-3Cl<sup>-</sup> calcd. for C<sub>53</sub>H<sub>49</sub>N<sub>6</sub>O<sub>6</sub><sup>5+</sup>: 865.3714, found: 865.3746.

### Tris-((*N*-butyl-imidazoliumyl-acetayloxy)methyl)ethane bis(trifluoromethylsulfonyl)amide (10b)

This compound was prepared analogously to **10a** using tris-((*N*-butyl-imidazoliumyl-acetayloxy)methyl)ethane chloride **8b** (0.72 g, 1.0 mmole) and Lithium bis-(trifluoromethanesulphonyl)imide LiNTf<sub>2</sub> (1.0 g, 3.5 mmol) to provide a clear viscous hygroscopic liquid at room temperature in 84% yield (1.22 g). Molecular Formula: C<sub>38</sub>H<sub>51</sub>F<sub>18</sub>N<sub>9</sub>O<sub>18</sub>S<sub>6</sub>; Mol. Wt.: 1456.22; FTIR (cm<sup>-1</sup>): 3055 (C-H)<sub>Ar</sub>, 2960, 2935, 2872 (C-H)<sub>Aliph</sub>, 1743 (C=O), 1642 (C=N), 1560, 1466 (C=C)<sub>Ar</sub>, 1351, 1223 (C-F), 1360, 1152 (O=S=O), 1195, 1163 (C-O); <sup>1</sup>H-NMR (400 MHz, CD<sub>3</sub>OD) δ ppm: 8.97 (s, 3H, C-H<sub>Imidazole</sub>, minor), 8.94 (s, 3H, C-H<sub>Imidazole</sub>, major), 8.80 (s, 3H, C-H<sub>Imidazole</sub>, minor), 7.70 (s, 3H, C-H<sub>Imidazole</sub>), 7.60 (s, 3H, C-H<sub>Imidazole</sub>, major), 7.50 (s, 3H, C-H<sub>Imidazole</sub>, minor), 5.20 (s, 6H, O-CH<sub>2</sub>, major), 5.19 (s, 6H, O-CH<sub>2</sub>, minor), 4.26 (t, *J*= 7.28 Hz, 6H, α-CH<sub>2</sub>), 4.19 (s, 6H, N-CH<sub>2</sub>, major), 4.16 (s, 6H, N-CH<sub>2</sub>, minor), 4.15 (s, 6H, N-CH<sub>2</sub>, minor), 1.80-1.73 (m, 6H, β-CH<sub>2</sub>, major), 1.92-1.83 (m, 6H, β-CH<sub>2</sub>), 1.42-1.33 (m, 6H, (ω-1), 1.08 (s, 3H, CH<sub>3</sub>), 0.98 (t, *J*=7.28 Hz, 9H, ω-CH<sub>3</sub>); <sup>13</sup>C-NMR (100 MHz, CD<sub>3</sub>OD) δ ppm: 167.90 (C=O, minor), 167.77 (C=O, major), 138.67 (CH<sub>Imidazole</sub>), 126.10, 122.91, 119.72, 116.54 (q, *J*=320, CF<sub>3</sub>), 125.37 (CH<sub>Imidazole</sub>), 123.69 (CH<sub>Imidazole</sub>), 68.83 (CH<sub>2</sub>-O, minor), 68.30 (CH<sub>2</sub>-O, minor), 68.10 (CH<sub>2</sub>-O, major), 51.03 (CH<sub>2</sub>-N), 50.87 (α-CH<sub>2</sub>), 40.10 (-C-), 33.39 ((ω-2), minor), 33.15 ((ω-2), major), 20.61 ((ω-1), minor), 20.52 ((ω-1), major), 17.04 (CH<sub>3</sub>, major), 17.00 (CH<sub>3</sub>, minor), 13.83 (ω). <sup>19</sup>F (336, MHz) δ ppm: -80.02; HRMS: m/z, [M<sup>+3</sup>-2H]-3NTf<sub>2</sub> calcd. for C<sub>32</sub>H<sub>49</sub>N<sub>6</sub>O<sub>6</sub><sup>5+</sup>: 613.3714, found: 613.3692; m/z, [NTf<sub>2</sub>] calcd. for C<sub>2</sub>F<sub>6</sub>NO<sub>4</sub>S<sub>2</sub><sup>-</sup>: 279.9173, found: 279.9175.

### Tris-((*N*-hexyl-imidazoliumyl-acetayloxy)methyl)ethane bis(trifluoromethylsulfonyl)amide (10c)

This compound was prepared analogously to **10a** using tris-((*N*-hexyl-imidazoliumyl-acetayloxy)methyl)ethane chloride **8c** (0.81 g, 1.0 mmole) and Lithium bis-(trifluoromethanesulphonyl)imide LiNTf<sub>2</sub> (1.0 g, 3.5 mmol) to provide a clear viscous hygroscopic liquid at room temperature in 85% yield (1.32 g). Molecular Formula: C<sub>44</sub>H<sub>63</sub>F<sub>18</sub>N<sub>9</sub>O<sub>18</sub>S<sub>6</sub>; Mol. Wt.: 1540.38; FTIR (cm<sup>-1</sup>): 3062 (C-H)<sub>Ar</sub>, 2950, 2931, 2845 (C-H)<sub>Aliph</sub>, 1749 (C=O), 1644 (C=N), 1564, 1460(C=C)<sub>Ar</sub>, 1347, 1220 (C-F), 1366, 1153 (O=S=O), 1185, 1185 (C-O); <sup>1</sup>H-NMR (400 MHz, CD<sub>3</sub>OD) δ ppm: 8.98 (bt~s, 3H, C-H<sub>Imidazole</sub>, minor), 8.96 (bt~s, 3H, C-H<sub>Imidazole</sub>, minor), 8.93 (bt~s, 3H, C-H<sub>Imidazole</sub>, major), 7.69 (t, *J*=1.81 Hz, 3H, C-H<sub>Imidazole</sub>, major), 7.63 (t, *J*=1.81 Hz, 3H, C-H<sub>Imidazole</sub>, minor), 7.61 (t, 3H, *J*=1.81 Hz, C-H<sub>Imidazole</sub>, minor), 7.59 (t, *J*=1.81 Hz, 3H, C-H<sub>Imidazole</sub>, major), 5.19 (s, 6H, O-CH<sub>2</sub>), 4.24 (t, *J*= 7.25 Hz, 6H, α-CH<sub>2</sub>), 4.19 (s, 6H, N-CH<sub>2</sub>, major), 4.14 (s, 6H, N-CH<sub>2</sub>, minor), 1.93-1.86 (m, 6H, β-CH<sub>2</sub>), 1.34 (bs, 18H, bulk-CH<sub>2</sub>), 1.08 (s, 3H, CH<sub>3</sub>), 0.90 (t, *J*=6.34 Hz, 9H, ω-CH<sub>3</sub>); <sup>13</sup>C-NMR (100 MHz, CD<sub>3</sub>OD) δ ppm: 167.77 (C=O), 138.65 (CH<sub>Imidazole</sub>), 126.15, 122.93, 119.71, 116.49 (q, *J*=320, CF<sub>3</sub>), 125.37 (CH<sub>Imidazole</sub>), 123.69 (CH<sub>Imidazole</sub>), 68.23 (CH<sub>2</sub>-O, minor), 68.15 (CH<sub>2</sub>-O, major), 51.31 (CH<sub>2</sub>-N), 50.89 (α-CH<sub>2</sub>), 40.11(-C-), 32.35 (ω-2), 31.14 (bulk-CH<sub>2</sub>), 26.99 (β-CH<sub>2</sub>), 23.58 (ω-1), 17.11 (CH<sub>3</sub>, minor), 17.07 (CH<sub>3</sub>, major), 14.38 (ω). <sup>19</sup>F (336, MHz) δ ppm: -80.22;

## Supplementary Information: Tris-imidazolium and benzimidazolium ionic liquids: A new class of biodegradable surfactants

Nassir N. Al-Mohammed, Rusnah Syahila Duali Hussien, Yatimah Alias and Zanariah Abdullah

HRMS: m/z,  $[M^{+3}-2H]-3NTF_2$  calcd. for  $C_{38}H_{61}N_6O_6^{5+}$ : 697.4653, found: 697.4623; m/z,  $[NTF_2]$  calcd. for  $C_2F_6NO_4S_2^-$ : 279.9173, found: 279.9177.

### Tris-((*N*-decyl-imidazoliumyl-acetayloxy)methyl)ethane bis(trifluoromethylsulfonyl)amide (10e)

This compound was prepared analogously to **10a** using tris-((*N*-decyl-imidazoliumyl-acetayloxy)methyl)ethane chloride **8e** (0.97 g, 1.0 mmole) and Lithium bis-(trifluoromethanesulphonyl)imide  $LiNTf_2$  (1.0 g, 3.5 mmol) to provide a clear viscous hygroscopic liquid at room temperature in 94% yield (1.6 g). Molecular Formula:  $C_{56}H_{87}F_{18}N_9O_{18}S_6$ ; Mol. Wt.: 1708.70; FTIR ( $cm^{-1}$ ): 3058 (C-H)<sub>Ar</sub>, 2955, 2929, 2857 (C-H)<sub>Aliph</sub>, 1749 (C=O), 1666 (C=N), 1564, 1462 (C=C)<sub>Ar</sub>, 1340, 1210 (C-F), 1360, 1123 (O=S=O), 1199, 1165 (C-O);  $^1H$ -NMR (400 MHz,  $CD_3OD$ )  $\delta$  ppm: 9.00 (bt~s, 3H, C-H<sub>Imidazole</sub>, minor), 8.98 (bt~s, 3H, C-H<sub>Imidazole</sub>, minor), 8.95 (bt~s, 3H, C-H<sub>Imidazole</sub>, major), 7.70 (t,  $J=1.81$ , 3H, C-H<sub>Imidazole</sub>, major), 7.65 (t, 3H, C-H<sub>Imidazole</sub>, minor), 7.61 (t,  $J=1.81$ , 3H, C-H<sub>Imidazole</sub>, major), 7.56 (t, 3H,  $J=1.81$ , C-H<sub>Imidazole</sub>, minor), 5.31 (s, 6H, O-CH<sub>2</sub>, minor), 5.21 (s, 6H, O-CH<sub>2</sub>, major), 4.25 (t,  $J=7.25$  Hz, 6H,  $\alpha$ -CH<sub>2</sub>), 4.21 (s, 6H, N-CH<sub>2</sub>), 4.19 (s, 6H, N-CH<sub>2</sub>), 1.94-1.87 (m, 6H,  $\beta$ -CH<sub>2</sub>), 1.33 (bs, 42H, bulk-CH<sub>2</sub>), 1.09 (s, 3H, CH<sub>3</sub>, major), 1.07 (s, 3H, CH<sub>3</sub>, minor), 0.90 (t, 9H,  $J=6.80$  Hz,  $\omega$ -CH<sub>3</sub>);  $^{13}C$ -NMR (100 MHz,  $CD_3OD$ )  $\delta$  ppm: 167.80 (C=O), 138.67 (CH<sub>Imidazole</sub>), 126.17, 122.94, 119.71, 116.49 (q,  $J=321$ , CF<sub>3</sub>), 125.38 (CH<sub>Imidazole</sub>), 123.70 (CH<sub>Imidazole</sub>), 68.17 (CH<sub>2</sub>-O), 51.32 (CH<sub>2</sub>-N), 50.88 ( $\alpha$ -CH<sub>2</sub>), 40.12 (-C-), 33.00 ( $\omega$ -2), 31.20, 30.30 (2), 30.15 (2) (bulk-CH<sub>2</sub>), 27.33 ( $\beta$ ), 23.80 ( $\omega$ -1), 17.07 (CH<sub>3</sub>), 14.53 ( $\omega$ ).  $^{19}F$  (336, MHz)  $\delta$  ppm: -80.52; HRMS: m/z,  $[M^{+3}-2H]-3NTF_2$  calcd. for  $C_{50}H_{85}N_6O_6^{5+}$  865.6531 found: 865.6512; m/z,  $[NTF_2]$  calcd. for  $C_2F_6NO_4S_2^-$ : 279.9173, found: 279.9148.

### Tris-((*N*-butyl-benzimidazoliumyl-acetayloxy)methyl)ethane bis(trifluoromethylsulfonyl)amide (11b)

This compound was prepared analogously to **10a** using tris-((*N*-butyl-benzimidazoliumyl-acetayloxy)methyl) ethane chloride **9b** (0.87 g, 1.0 mmole) and Lithium bis-(trifluoromethanesulphonyl)imide  $LiNTf_2$  (1.0 g, 3.5 mmol) to provide a clear viscous hygroscopic liquid at room temperature in 84% yield (1.35 g). Molecular Formula:  $C_{50}H_{57}F_{18}N_9O_{18}S_6$ ; Mol. Wt.: 1606.39; FTIR ( $cm^{-1}$ ): 3022 (C-H)<sub>Ar</sub>, 2950, 2942, 2863 (C-H)<sub>Aliph</sub>, 1755(C=O), 1618(C=N), 1564, 1485, 1469 (C=C)<sub>Ar</sub>, 1374, 1233 (C-F), 1354, 1169 (O=S=O), 1187, 1160 (C-O);  $^1H$ -NMR (400 MHz, DMSO- $d_6$ )  $\delta$  ppm: 9.94 (s, 3H, C-H<sub>BImidazole</sub>, minor), 9.89 (s, 3H, C-H<sub>BImidazole</sub>, minor), 9.82 (s, 3H, C-H<sub>BImidazole</sub>), 8.10-8.04 (m, 6H, CH<sub>Ar</sub>), 7.68-7.59 (m, 6H, CH<sub>Ar</sub>, major), 7.27-7.22 (m, 6H, CH<sub>Ar</sub>, minor), 5.65 (s, 6H, O-CH<sub>2</sub>, minor), 5.60 (s, 6H, O-CH<sub>2</sub>, major), 4.47 (t,  $J=7.07$ , 6H,  $\alpha$ -CH<sub>2</sub>, major), 4.27 (t,  $J=7.07$ , 6H,  $\alpha$ -CH<sub>2</sub>, minor), 4.01 (s, 6H, N-CH<sub>2</sub>, major), 3.98 (s, 6H, N-CH<sub>2</sub>, minor), 1.87-1.79 (m, 6H,  $\beta$ -CH<sub>2</sub>, major), 1.66-1.59 (m, 6H,  $\beta$ -CH<sub>2</sub>, minor), 1.28-1.18 (m, 6H, ( $\omega$ -1)), 0.93 (s, 3H, CH<sub>3</sub>), 0.87 (t, 9H,  $J=7.21$  Hz,  $\omega$ -CH<sub>3</sub>);  $^{13}C$ -NMR (100 MHz, DMSO- $d_6$ )  $\delta$  ppm: 166.76 (C=O), 144.03 (CH<sub>BImidazole</sub>, major), 143.867 (CH<sub>BImidazole</sub>, minor), 132.45 (C<sub>Ar</sub>), 128.90 (C<sub>Ar</sub>), 125.30, 122.09, 118.88, 115.67 (q,  $J=321$ , CF<sub>3</sub>), 125.02 (CH<sub>Ar</sub>), 124.14 (CH<sub>Ar</sub>), 112.85 (CH<sub>Ar</sub>), 110.17 (CH<sub>Ar</sub>), 68.03 (CH<sub>2</sub>-O), 46.55 (CH<sub>2</sub>-N), 44.03 ( $\alpha$ -CH<sub>2</sub>, minor), 43.78 ( $\alpha$ -CH<sub>2</sub>, major), 38.31 (-C-), 32.17 (( $\omega$ -2), minor), 31.90 (( $\omega$ -2), major), 18.55 (( $\omega$ -1), major), 17.95 (( $\omega$ -1), minor), 15.74 (CH<sub>3</sub>), 13.23 (( $\omega$ ), minor), 13.12 (( $\omega$ ), major).  $^{19}F$  (336, MHz)  $\delta$  ppm: -80.12; HRMS: m/z,  $[M^{+3}-2H]-3NTF_2$  calcd. for



## Supplementary Information: Tris-imidazolium and benzimidazolium ionic liquids: A new class of biodegradable surfactants

Nassir N. Al-Mohammed, Rusnah Syahila Duali Hussien, Yatimah Alias and Zanariah Abdullah

$C_{44}H_{55}N_6O_6^{5+}$ : 763.4183, found: 763.4202;  $m/z$ , [NTF<sub>2</sub>] calcd. for  $C_2F_6NO_4S_2^-$ : 279.9173, found: 279.9209.

### Tris-((*N*-decyl-benzimidazoliumyl-acetayloxy)methyl)ethane bis(trifluoromethylsulfonyl)amide (11e)

This compound was prepared analogously to **10a** using tris-((*N*-decyl-benzimidazoliumyl-acetayloxy)-methyl) ethane chloride **9e** (1.12 g, 1.0 mmole) and Lithium bis-(trifluoromethanesulphonyl)imide LiNTf<sub>2</sub> (1.0 g, 3.5 mmol) to provide a clear viscous hygroscopic liquid at room temperature in 90% yield (1.67 g). Molecular Formula: C<sub>68</sub>H<sub>93</sub>F<sub>18</sub>N<sub>9</sub>O<sub>18</sub>S<sub>6</sub>; Mol. Wt.: 1858.88; FTIR (cm<sup>-1</sup>): 3130 (C-H)<sub>Ar</sub>, 2949, 2924, 2848 (C-H)<sub>Aliph</sub>, 1749 (C=O), 1620 (C=N), 1566 1485, 1457 (C=C)<sub>Ar</sub>, 1367, 1223 (C-F), 1360, 1165 (O=S=O), 1218, 1199 (C-O); <sup>1</sup>H-NMR (400 MHz, CD<sub>3</sub>OD) δ ppm: 9.54 (s, 3H, C-H<sub>BImidazole</sub>, minor), 9.48 (s, 3H, C-H<sub>BImidazole</sub>, minor), 9.42 (s, 3H, C-H<sub>BImidazole</sub>, major), 8.02-7.82 (m, 6H, CH<sub>Ar</sub>), 7.73-7.55 (m, 6H, CH<sub>Ar</sub>), 5.51 (s, 6H, O-CH<sub>2</sub>, minor), 5.50 (s, 6H, O-CH<sub>2</sub>, minor), 5.48 (s, 6H, O-CH<sub>2</sub>, major), 4.57 (t, *J*=7.20, 6H, α-CH<sub>2</sub>, major), 4.50 (t, *J*=7.20, 6H, α-CH<sub>2</sub>, minor), 4.21 (s, 6H, N-CH<sub>2</sub>, major), 4.19 (s, 6H, N-CH<sub>2</sub>, minor), 4.17 (s, 6H, N-CH<sub>2</sub>, minor), 2.04- 1.94 (m, 6H, β-CH<sub>2</sub>), 1.27 (bs, 42H, bulk-CH<sub>2</sub>), 1.04 (s, 3H, CH<sub>3</sub>, major), 1.02 (s, 3H, CH<sub>3</sub>, minor), 0.88 (t, 9H, *J*=6.78, ω-CH<sub>3</sub>); <sup>13</sup>C-NMR (100 MHz, CD<sub>3</sub>OD) δ ppm: 167.66 (C=O, major), 167.57 (C=O, minor), 144.05 (CH<sub>BImidazole</sub>), 133.31 (C<sub>Ar</sub>), 132.57 (C<sub>Ar</sub>), 128.78 (CH<sub>Ar</sub>), 128.60 (CH<sub>Ar</sub>), 126.17, 122.95, 119.73, 116.51 (q, *J*=320, CF<sub>3</sub>), 114.79 (2) (CH<sub>Ar</sub>), 68.07 (CH<sub>2</sub>-O, minor), 67.85 (CH<sub>2</sub>-O, major), 46.69 (CH<sub>2</sub>-N), 41.89 (α-CH<sub>2</sub>, minor), 41.70 (α-CH<sub>2</sub>, major), 40.50 (-C-), 33.17 (ω-2), 30.72, 30.65, 30.54, 30.25 (2) (bulk-CH<sub>2</sub>), 27.58 (β), 23.85 (ω-1), 17.07 (CH<sub>3</sub>, minor), 16.97 (CH<sub>3</sub>, major), 14.58 (ω). <sup>19</sup>F (336, MHz) δ ppm: -80.06; HRMS:  $m/z$ , [M<sup>+3</sup>-2H]-3NTf<sub>2</sub> calcd. for C<sub>62</sub>H<sub>91</sub>N<sub>6</sub>O<sub>6</sub><sup>5+</sup> : 1015.7000, found: 1015.6977;  $m/z$ , [NTF<sub>2</sub>] calcd. for C<sub>2</sub>F<sub>6</sub>NO<sub>4</sub>S<sub>2</sub><sup>-</sup>: 279.9173, found: 279.9175.

### Tris-((*N*-dodecyl-benzimidazoliumyl-acetayloxy)methyl)ethane bis(trifluoromethylsulfonyl)amide (11f)

This compound was prepared analogously to **10a** using tris-((*N*-dodecyl-benzimidazoliumyl-acetayloxy)-methyl) ethane chloride **9f** (1.21 g, 1.0 mmole) and Lithium bis-(trifluoromethanesulphonyl)imide LiNTf<sub>2</sub> (1.0 g, 3.5 mmol) to provide a clear viscous hygroscopic liquid at room temperature in 96% yield (1.87 g). Molecular Formula: C<sub>74</sub>H<sub>105</sub>F<sub>18</sub>N<sub>9</sub>O<sub>18</sub>S<sub>6</sub>; Mol. Wt.: 1943.04 ; FTIR (cm<sup>-1</sup>): 3127 (C-H)<sub>Ar</sub>, 2965 (C-H)<sub>Aliph</sub>, 1750 (C=O), 1622 (C=N), 1565, 1485, 1448 (C=C)<sub>Ar</sub>, 1362, 1222 (C-F), 1358, 1167 (O=S=O), 1210, 1170 (C-O); <sup>1</sup>H-NMR (400 MHz, CD<sub>3</sub>OD) δ ppm: 9.72 (s, 3H, C-H<sub>BImidazole</sub>, minor), 9.69 (s, 3H, C-H<sub>BImidazole</sub>, minor), 9.65 (s, 3H, C-H<sub>BImidazole</sub>, major), 8.00-7.91 (m, 6H, C-H<sub>BImidazole</sub>), 7.71-7.54 (m, 6H, C-H<sub>Ar</sub>, major), 7.40-7.31 (m, 6H, C-H<sub>Ar</sub>, minor), 5.60 (s, 6H, O-CH<sub>2</sub>, major), 5.57 (s, 6H, O-CH<sub>2</sub>, minor), 4.53 (t, *J*=7.07, 6H, α-CH<sub>2</sub>, major), 4.34 (t, *J*=7.07, 6H, α-CH<sub>2</sub>, minor), 4.19 (s, 6H, N-CH<sub>2</sub>, major), 4.16 (s, 6H, N-CH<sub>2</sub>, minor), 1.98-1.92 (m, 6H, β-CH<sub>2</sub>), 1.24 (bs, 54H, bulk-CH<sub>2</sub>), 1.03 (s, 3H, CH<sub>3</sub>, minor), 1.00 (s, 3H, CH<sub>3</sub>, minor), 0.97 (s, 3H, CH<sub>3</sub>, major), 0.86 (t, *J*=7.25, 9H, ω-CH<sub>3</sub>); <sup>13</sup>C-NMR (100 MHz, CD<sub>3</sub>OD) δ ppm: 166.89 (C=O), 143.75 (CH<sub>BImidazole</sub>, major), 143.51 (CH<sub>BImidazole</sub>, minor), 133.10 (C<sub>BImidazole</sub>), 130.92 (C<sub>BImidazole</sub>), 128.08 (CH<sub>Ar</sub>), 127.12 (CH<sub>Ar</sub>), 126.36, 123.14, 119.92, 116.71 (q, *J*=320, CF<sub>3</sub>), 114.81 (CH<sub>Ar</sub>), 114.76 (CH<sub>Ar</sub>), 68.37 (CH<sub>2</sub>-O, minor), 68.24 (CH<sub>2</sub>-O, major), 45.70 (CH<sub>2</sub>-N), 40.18 (α-CH<sub>2</sub>), 39.34 (-C-), 31.65 (ω-2), 29.66 (2), 29.32, 29.22, 29.03, 28.93, 28.86 (bulk-CH<sub>2</sub>), 25.82 (β),

## Supplementary Information: Tris-imidazolium and benzimidazolium ionic liquids: A new class of biodegradable surfactants

Nassir N. Al-Mohammed, Rusnah Syahila Duali Hussien, Yatimah Alias and Zanariah Abdullah

22.53 ( $\omega$ -1), 16.23 (CH<sub>3</sub>, minor), 16.03 (CH<sub>3</sub>, major), 14.19 ( $\omega$ ). <sup>19</sup>F (336, MHz)  $\delta$  ppm: -80.20; HRMS: m/z, [M<sup>+3</sup>-2H]-3NTF<sub>2</sub> calcd. for C<sub>68</sub>H<sub>103</sub>N<sub>6</sub>O<sub>6</sub><sup>5+</sup>: 1099.7939, found: 1099.7977; m/z, [NTF<sub>2</sub>] calcd. for C<sub>2</sub>F<sub>6</sub>NO<sub>4</sub>S<sub>2</sub><sup>-</sup>: 279.9173, found: 279.9225.

### Tris-((*N*-benzyl-benzimidazoliumyl-acetayloxy)methyl)ethane bis(trifluoromethylsulfonyl)-amide (11g)

This compound was prepared analogously to **10a** using tris-((*N*-benzyl-benzimidazoliumyl-acetayloxy)-methyl)ethane chloride **9g** (0.97 g, 1.0 mmole) and Lithium bis-(trifluoromethanesulphonyl)imide LiNTf<sub>2</sub> (1.0 g, 3.5 mmol) to provide a clear viscous hygroscopic liquid at room temperature in 96% yield (1.63 g). Molecular Formula: C<sub>59</sub>H<sub>51</sub>F<sub>18</sub>N<sub>9</sub>O<sub>18</sub>S<sub>6</sub>; Mol. Wt.: 1708.45; FTIR (cm<sup>-1</sup>): 3127 (C-H)<sub>Ar</sub>, 2965 (C-H)<sub>Aliph</sub>, 1750 (C=O), 1622 (C=N), 1565, 1485, 1448 (C=C)<sub>Ar</sub>, 1362, 1222 (C-F), 1358, 1167 (O=S=O), 1210, 1170 (C-O); <sup>1</sup>H-NMR (400 MHz, DMSO-*d*<sub>6</sub>)  $\delta$  ppm: 10.44 (s, 3H, C-H<sub>BImidazole</sub>, major), 10.30 (s, 3H, C-H<sub>BImidazole</sub>, minor), 10.13 (s, 3H, C-H<sub>BImidazole</sub>, minor), 8.12-8.00 (m, 6H, C-H<sub>Ar</sub>), 7.61-7.53 (m, 12H, C-H<sub>Ar</sub>), 7.39-7.22 (m, 9H, C-H<sub>Ar</sub>), 5.92 (s, 6H, CH<sub>2</sub>-Ar), 5.84 (s, 6H, O-CH<sub>2</sub>, major), 5.79 (s, 6H, O-CH<sub>2</sub>, minor), 4.04 (s, 6H, N-CH<sub>2</sub>, major), 3.99 (s, 6H, N-CH<sub>2</sub>, minor), 0.91 (s, 3H, CH<sub>3</sub>, minor), 0.86 (s, 3H, CH<sub>3</sub>, minor), 0.82 (s, 3H, CH<sub>3</sub>, major); <sup>13</sup>C-NMR (100 MHz, DMSO-*d*<sub>6</sub>)  $\delta$  ppm: 168.01 (C=O, major), 166.57 (C=O, minor), 143.48 (CH<sub>BImidazole</sub>, major), 142.82 (CH<sub>BImidazole</sub>, minor), 133.82 (-C<sub>Ar</sub>-CH<sub>2</sub>-), 131.79 (C<sub>BImidazole</sub>), 130.48 (C<sub>BImidazole</sub>), 129.10 (2×CH<sub>Ar</sub>), 128.87 (CH<sub>Ar</sub>), 128.31 (2×CH<sub>Ar</sub>), 126.98 (CH<sub>BImidazole</sub>), 126.81 (CH<sub>BImidazole</sub>), 124.37, 121.13, 117.90, 114.66 (q, *J*=322, CF<sub>3</sub>), 114.06 (CH<sub>BImidazole</sub>), 113.89 (CH<sub>BImidazole</sub>), 63.33 (CH<sub>2</sub>-O, major), 62.67 (CH<sub>2</sub>-O, minor), 50.00 (CH<sub>2</sub>-N), 47.72 (Ar-CH<sub>2</sub>-, major), 47.61 (Ar-CH<sub>2</sub>-, minor), 40.63 (-C-), 16.33 (CH<sub>3</sub>, major), 16.08 (CH<sub>3</sub>, minor). <sup>19</sup>F (336, MHz)  $\delta$  ppm: -79.95; HRMS: m/z, [M<sup>+3</sup>-2H]-3NTF<sub>2</sub> calcd. for C<sub>53</sub>H<sub>49</sub>N<sub>6</sub>O<sub>6</sub><sup>5+</sup>: 865.3714, found: 865.3750; m/z, [NTF<sub>2</sub>] calcd. for C<sub>2</sub>F<sub>6</sub>NO<sub>4</sub>S<sub>2</sub><sup>-</sup>: 279.9173, found: 279.9214.
